# Supplementary material for: Microbial degradation of jellyfish detritus promotes phytoplankton growth in coastal marine ecosystems
Source: Research Square preprint supplement (doi:10.21203/rs.3.rs-7053203/v1), 2025-07-14
Supplement: Supplementary file 1 [file 0b47b75c14f3b9666bf84936.pdf]

**Table S2 - Bacterial community growth parameters during exponential growth phase in the first stage of our microcosm experiment in jelly-OM amended bottles and in control treatments with no jelly-OM amendment**

The values represent a mean and standard deviation of three biological replicates.

BCD - bacterial carbon demand [ $\mu\text{g C L}^{-1} \text{ h}^{-1}$ ].

BB - [ $\mu\text{g C L}^{-1}$ ]

BP - bacterial productivity [ $\mu\text{g C L}^{-1} \text{ h}^{-1}$ ].

BR - bacterial respiration [ $\mu\text{g C L}^{-1} \text{ h}^{-1}$ ].

BGE - bacterial growth efficiency.

$\mu$  - cell doubling time [ $\text{h}^{-1}$ ]

| Treatment | BCD        | BB          | BP        | BR        | BGE       | $\mu$  |
|-----------|------------|-------------|-----------|-----------|-----------|--------|
| Control   | 1.8±0.51   | 10.8±3.22   | 0.17±0.09 | 1.63±0.56 | 0.12±0.07 | 0.01±0 |
| Jelly-OM  | 14.69±2.95 | 45.42±11.58 | 4.76±1.28 | 9.93±4.17 | 0.4±0.2   | 0.1±0  |
